# Supplementary material for: Dairy-Protein-Based Aggregates as Additives Enriched with Tart Cherry Polyphenols and Flavor Compounds
Source: MDPI journal article supplement (doi:10.3390/foods12112104), 2023-05-24
Supplement: s1 [file s1]

## Supplementary material

### Dairy Protein-Based Aggregates as Additives Enriched with Tart Cherry Polyphenols and Flavor Compounds

Mirela Kopjar <sup>1,\*</sup>, Ivana Buljeta <sup>1</sup>, Ina Ćorković <sup>1</sup>, Vanja Kelemen <sup>2</sup>, Anita Pichler <sup>1</sup>, Ivana Ivić <sup>1</sup> and Josip Šimunović <sup>3</sup>

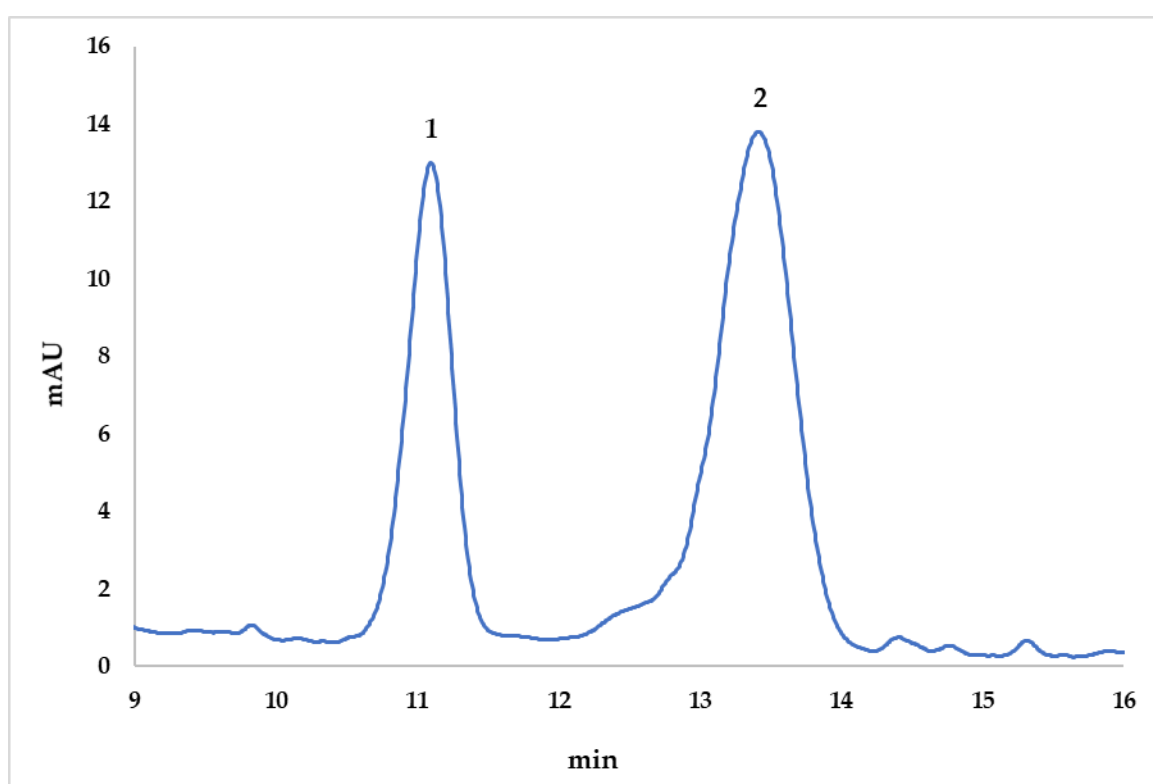

Figure S1 HPLC chromatogram at 520 nm of sample Cas2%\_TC (1 – cyanidin-3-glucosyl-rutinoside; 2 – cyanidin-3-rutinoside)

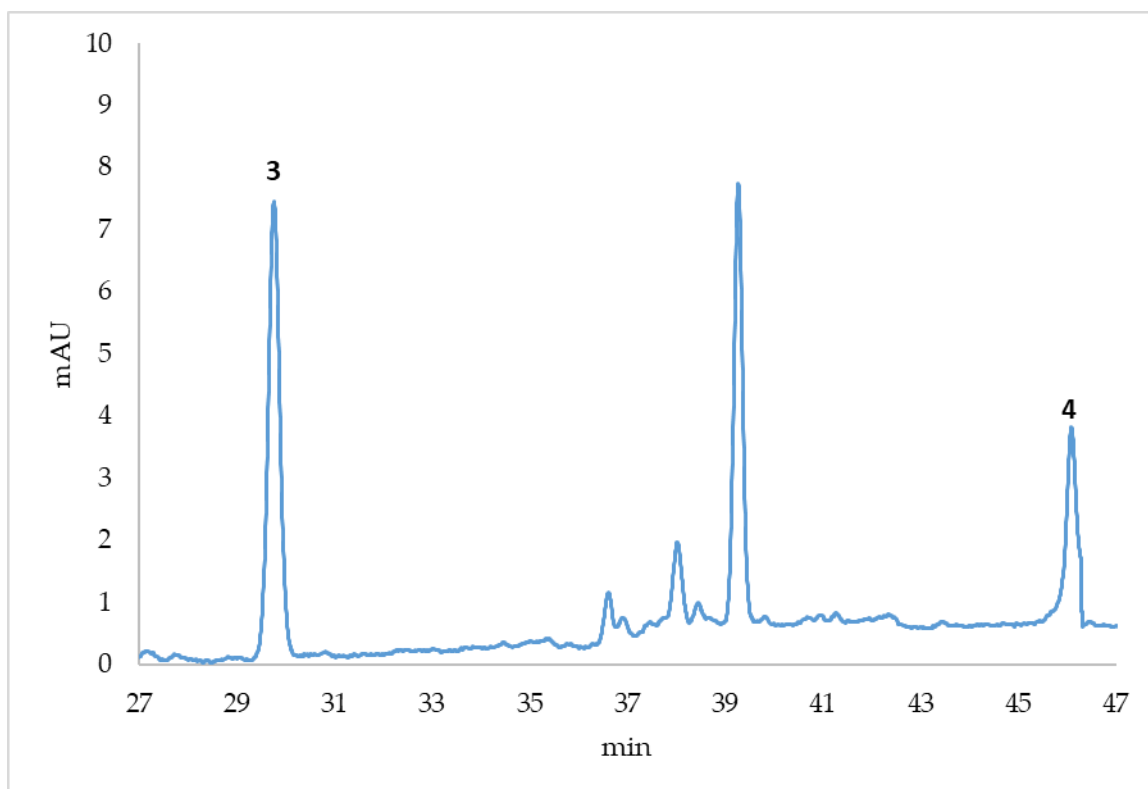

Figure S2 HPLC chromatogram at 360 nm of sample Cas2%\_TC (3 – rutin; 4 – quercetin)

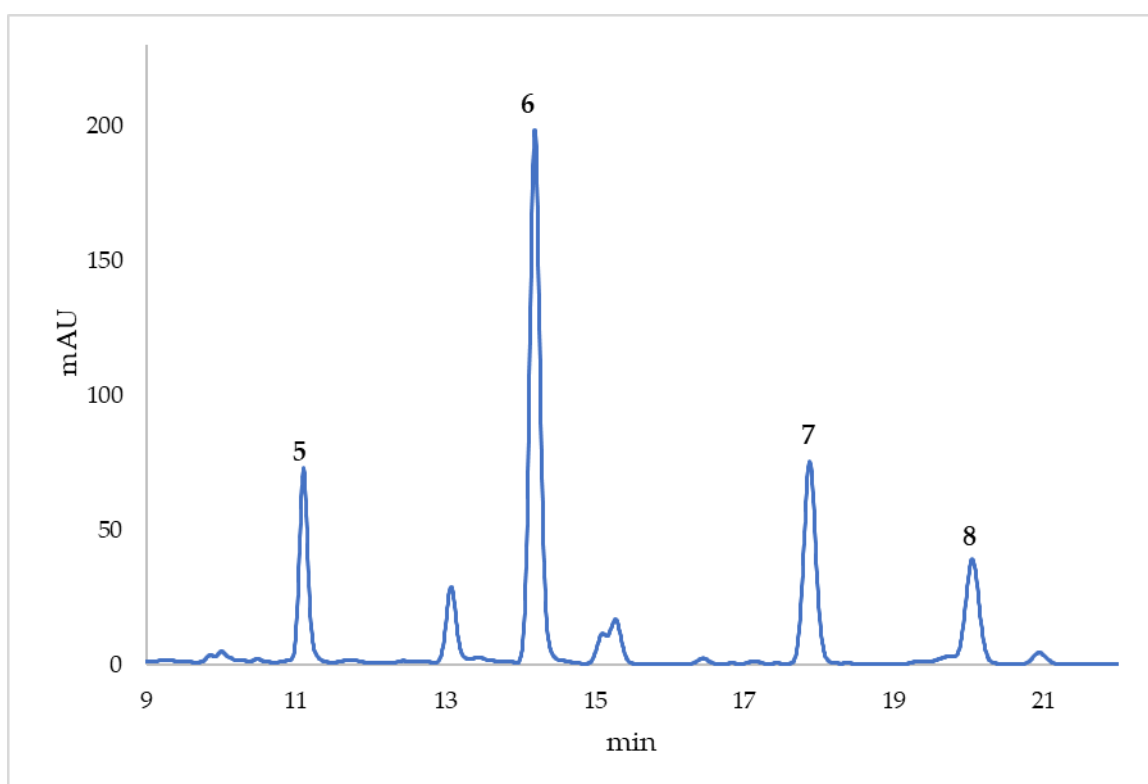

Figure S3 HPLC chromatogram at 320 nm of sample Cas2%\_TC (5 – chlorogenic acid; 6 – *p*-coumaric acid derivate; 7 – neochlorogenic acid; 8 – *p*-coumaric acid)

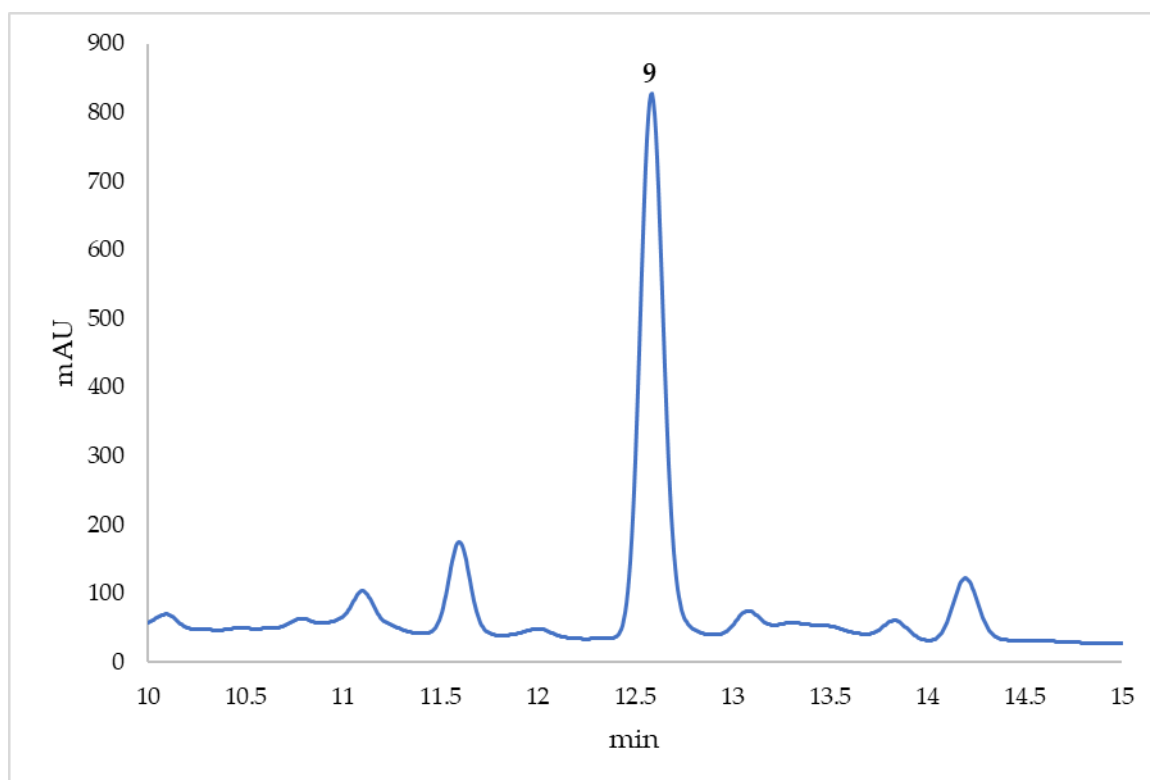

Figure S4 HPLC chromatogram at 210 nm of sample Cas2%\_TC (9 – (-)-epicatechin)
